# Supplementary material for: A Deep-Learning Model With the Attention Mechanism Could Rigorously Predict Survivals in Neuroblastoma
Source: Front Oncol. 2021 Jul 14;11:653863. doi: 10.3389/fonc.2021.653863 (PMC8317851; doi:10.3389/fonc.2021.653863)
Supplement: Supplementary file 12 [file Table_1.xlsx]

## Sheet: Table.S1
Table.S1 Basic characteristics of samples in GSE49710 and E-MTAB-8248 cohorts.
GSE49710							E-MTAB-8248
	S1	S2	All	P-value				S1	S2	All	P-value
Age	1.383±2.166	3.521±3.431	2.078±2.825	<0.001			Age	2.526±3.942	3.460±2.776	2.844±3.608	<0.001
Gender							MYCN
Male	197	90	287	0.58			Amplified	1	45	46	<0.001
Female	139	72	211				Non-amplified	146	31	177
MYCN							Stage				<0.001
Amplified	0	92	92	<0.001			1	26	3	29
Non-amplified	334	67	401				2	32	7	39
							3	23	13	36
Stage							4	40	49	89
1	117	4	121	<0.001			4S	26	4	30
2	68	10	78
3	42	21	63				OS_status				<0.001
4	62	121	183				Alive	140	41	181
4S	47	6	53				Dead	7	35	42
Risk							OS_time	6.969±3.822	4.415±3.735	6.098±3.974	<0.001
High	35	141	176	<0.001
Low	301	21	322				EFS_status				<0.001
							Alive	107	27	134
OS_status							Dead	40	49	89
Alive	320	73	393	<0.001
Dead	16	89	105				EFS_time	5.603±3.916	2.678±2.690	4.606±3.803	<0.001
OS_time	7.237±3.469	3.395±2.913	5.987±3.756	<0.001
EFS_status
Alive	269	46	315	<0.001
Dead	67	116	183
EFS_time	6.283±3.987	2.405±2.692	5.021±4.046	<0.001

## Sheet: Table.S2
Table.S2 Scores of 3 models
GSE49710					EMTAB
Sample Name	Zhong et.al	De Preter et.al	DL-model		Sample Name	Zhong et.al	De Preter et.al	DL-model
SEQC_NB001	1.1587	1.52439	0.826573		NBC-1	0.269147	-0.699967	0.965184
SEQC_NB002	1.30097	2.64138	0.880311		NBC-10	0.911448	-4.30711	0.72011
SEQC_NB003	2.13381	3.00145	0.192867		NBC-100	-0.164515	0.0998487	0.000268221
SEQC_NB004	1.38354	1.92615	0.738641		NBC-101	-0.151811	-1.18362	0.00382468
SEQC_NB005	1.79739	3.09267	0.875416		NBC-102	-0.605065	0.942249	0.0011279
SEQC_NB006	0.26675	-1.50395	0.0163539		NBC-103	0.412725	-0.0325141	0.0523218
SEQC_NB007	0.127092	0.180293	0.00951335		NBC-104	-0.359491	0.106353	0.00147346
SEQC_NB008	1.50853	1.95349	0.0407063		NBC-105	0.119301	-1.13379	0.000473171
SEQC_NB009	2.11915	2.39467	0.0843225		NBC-106	0.553498	0.0102845	1.24142e-05
SEQC_NB010	1.92133	2.67536	0.669816		NBC-107	-0.174932	0.544211	0.0574456
SEQC_NB011	-1.36645	-1.93215	0.00022909		NBC-108	0.0623261	1.49926	5.48117e-06
SEQC_NB012	-1.03314	-1.32335	0.000975072		NBC-109	0.0546493	4.16971	0.265057
SEQC_NB013	-1.03798	2.2312	0.0302632		NBC-11	0.536953	1.92818	0.942292
SEQC_NB014	-1.38603	-0.0359412	0.00158679		NBC-111	0.28907	0.688592	1.67814e-05
SEQC_NB015	-0.585614	-2.07704	0.00150236		NBC-112	-0.645945	0.512413	0.000296146
SEQC_NB016	-0.291276	-0.964899	2.90395e-05		NBC-113	0.0377994	-0.394863	2.0844e-05
SEQC_NB017	-1.44187	-2.94775	1.49623e-05		NBC-114	-0.56397	3.58179	0.452245
SEQC_NB018	-0.205413	-1.20509	0.00146911		NBC-115	0.19828	-0.255865	0.000847906
SEQC_NB019	-1.02074	-0.56806	0.00381553		NBC-118	-0.149469	1.06242	0.0373377
SEQC_NB020	-0.828923	-0.695105	0.00020352		NBC-12	-0.603781	-0.490667	0.926031
SEQC_NB021	-0.698793	-0.748991	0.0135312		NBC-120	0.495884	-1.62466	0.00169659
SEQC_NB022	-0.424093	-0.619101	0.00034979		NBC-122	0.0693552	1.50236	1.09514e-05
SEQC_NB023	-0.988584	-0.477473	0.000295877		NBC-123	0.682319	2.21337	0.00926965
SEQC_NB024	-0.681515	-1.34076	0.00348619		NBC-124	0.380674	-1.8312	0.000620127
SEQC_NB025	-0.691882	-0.830854	0.0723124		NBC-125	-0.463251	-0.501461	0.000172228
SEQC_NB026	-0.760049	-1.69257	0.00136322		NBC-126	-0.163957	0.629712	4.83595e-05
SEQC_NB027	-0.980609	-1.41502	0.000302523		NBC-128	0.570821	0.70551	0.000552773
SEQC_NB028	-1.20405	-3.02884	8.61866e-05		NBC-129	-0.268353	1.85078	0.713153
SEQC_NB029	-0.4776	-0.63085	0.00272012		NBC-130	0.216684	-0.900113	0.000487924
SEQC_NB030	-0.835333	-1.81193	6.54553e-05		NBC-131	0.655002	-1.02351	0.00127608
SEQC_NB031	-0.67425	0.114773	9.79283e-05		NBC-133	-0.079872	0.161421	0.000194728
SEQC_NB032	-0.742956	-1.33238	0.000183433		NBC-134	0.258596	-0.921224	0.00236839
SEQC_NB033	-0.819101	-1.25896	0.000511557		NBC-135	-0.756251	-3.93101	0.000167966
SEQC_NB034	-0.539028	0.558122	0.00407317		NBC-136	0.210872	-2.21915	1.23963e-05
SEQC_NB035	-0.954892	-1.50874	0.000216216		NBC-138	-0.302564	1.52649	0.017177
SEQC_NB036	-1.02755	-1.77162	0.000113174		NBC-139	0.304253	-2.10047	0.00159284
SEQC_NB037	-0.896287	-2.28573	4.97823e-05		NBC-141	0.308401	-3.30223	0.00139114
SEQC_NB038	-1.04696	-0.771531	0.00030902		NBC-142	0.134094	-0.406909	0.000234574
SEQC_NB039	-0.501588	-0.732635	7.53431e-05		NBC-143	0.320751	2.08193	7.35713e-06
SEQC_NB040	-0.826715	-3.12998	0.000698149		NBC-144	0.254352	-2.04766	8.07111e-05
SEQC_NB041	-1.48965	-3.16613	0.00042969		NBC-145	-0.471022	0.350556	0.0723329
SEQC_NB042	-0.477507	-1.26482	0.00107342		NBC-146	-0.133562	-1.03105	0.000227392
SEQC_NB043	-1.45692	-2.27703	0.000569105		NBC-148	-0.65486	3.48692	0.0537455
SEQC_NB044	-1.43097	-2.27079	0.00116462		NBC-149	0.0460999	-2.20853	0.0453327
SEQC_NB045	-1.30261	-3.54562	3.17169e-06		NBC-150	0.202581	0.659406	0.912249
SEQC_NB046	-0.832636	-1.68661	8.37378e-05		NBC-151	0.212418	1.44537	0.944365
SEQC_NB047	-1.14415	-0.584403	0.000201136		NBC-152	0.00716667	2.56372	0.844864
SEQC_NB048	0.0169462	-1.88918	0.00205898		NBC-153	-0.785979	3.60403	0.276059
SEQC_NB049	-0.881597	-0.0611022	0.000834793		NBC-154	-0.44989	5.25318	0.0456409
SEQC_NB050	-0.641093	-1.23806	0.000147074		NBC-155	-0.0963815	5.64778	0.624407
SEQC_NB051	-1.56915	-1.77792	3.65873e-06		NBC-156	-0.391972	2.77008	0.12644
SEQC_NB052	-0.609764	-2.91125	0.000112281		NBC-157	-0.829514	6.21621	0.987191
SEQC_NB053	-0.909085	-1.58746	0.00108406		NBC-158	1.24375	2.17619	0.24316
SEQC_NB054	-0.689678	1.36136	0.000231683		NBC-159	1.27607	0.447574	0.894207
SEQC_NB055	-1.25788	-3.90149	6.45723e-06		NBC-16	-1.27672	-5.88172	0.938613
SEQC_NB056	-1.14366	-2.32813	1.03702e-05		NBC-160	-0.204354	3.83593	0.164431
SEQC_NB057	-0.682147	-2.04791	0.000639647		NBC-164	-0.284323	6.23381	0.199478
SEQC_NB058	-0.0751965	-0.00663255	0.00896934		NBC-166	0.324064	0.693212	0.178192
SEQC_NB059	-0.950443	-1.89636	7.87035e-05		NBC-167	1.44982	4.35179	0.0592826
SEQC_NB060	-1.50293	-3.04683	4.76476e-05		NBC-168	0.516736	0.387646	0.0550713
SEQC_NB061	-0.179309	-0.565688	0.00200126		NBC-169	0.0213137	2.59544	0.712151
SEQC_NB062	-1.1433	-0.583489	0.000104458		NBC-17	-1.1284	-1.15774	0.00947809
SEQC_NB063	-1.46249	-2.0024	2.2277e-05		NBC-170	-0.0911277	3.15302	0.64708
SEQC_NB064	-0.844417	-3.23224	0.000480622		NBC-171	0.814364	1.49298	0.718664
SEQC_NB065	-0.640783	0.182623	0.000410169		NBC-172	-1.15083	6.80959	0.953883
SEQC_NB066	-0.920523	-1.5948	0.000213534		NBC-173	1.85545	6.33666	0.54789
SEQC_NB067	-0.671245	-1.35408	0.000279725		NBC-174	-1.32455	2.02791	0.289443
SEQC_NB068	-0.820741	-0.876647	0.000174701		NBC-175	-0.514363	1.8636	0.897359
SEQC_NB069	0.584414	-0.122596	0.685635		NBC-176	-0.0359505	0.83946	0.073994
SEQC_NB070	-0.929345	-1.40922	5.87137e-05		NBC-177	-0.541936	0.23982	0.0475329
SEQC_NB071	-1.5144	-1.89617	6.23643e-05		NBC-178	-0.21855	1.37364	0.0588536
SEQC_NB072	-1.3486	-2.20118	1.48338e-05		NBC-179	-0.223082	2.00217	0.959318
SEQC_NB073	-0.68531	-1.58593	0.000233173		NBC-18	-0.0325346	-1.00961	0.51855
SEQC_NB074	0.385929	2.3608	0.0366935		NBC-180	0.101705	-0.507592	0.529804
SEQC_NB075	-0.743696	0.0604886	0.00103834		NBC-181	-0.504012	2.75985	0.956403
SEQC_NB076	-1.22096	-1.90031	9.33257e-05		NBC-182	0.0667783	3.45933	0.0574946
SEQC_NB077	-1.84764	-2.42007	4.62423e-06		NBC-183	-0.805824	3.84577	0.39652
SEQC_NB078	-0.770889	-2.70361	1.01225e-05		NBC-185	0.641211	-0.257766	0.38139
SEQC_NB079	-1.22729	-2.28411	1.72038e-05		NBC-187	0.374098	3.02041	0.359025
SEQC_NB080	0.857139	4.07642	0.958975		NBC-188	-0.068713	3.40576	0.199838
SEQC_NB081	0.656892	2.86359	0.0379182		NBC-189	-0.0415666	8.70544	0.607637
SEQC_NB082	0.361754	1.16095	0.0904472		NBC-190	-0.430238	2.75403	0.522593
SEQC_NB083	0.17447	0.0928912	0.0217927		NBC-191	-0.929642	8.19208	0.923404
SEQC_NB084	-0.447179	-1.71523	3.64485e-06		NBC-193	0.486635	-0.30653	0.203682
SEQC_NB085	-0.394986	-0.387415	0.0247626		NBC-194	-0.0198153	0.521069	0.0066646
SEQC_NB086	1.0009	0.531381	0.0240945		NBC-195	0.180798	1.21484	0.00166994
SEQC_NB087	-0.682461	1.24614	0.0454116		NBC-197	0.887958	2.90567	0.000231445
SEQC_NB088	0.180682	1.66691	0.00105292		NBC-199	-2.93808	3.4142	0.155382
SEQC_NB089	-0.595677	-2.27965	0.000281572		NBC-20	0.0698493	-0.631819	0.0283075
SEQC_NB090	-0.325842	2.9919	0.331187		NBC-200	-2.65717	3.15672	0.000318468
SEQC_NB091	0.0119398	2.09976	0.0788455		NBC-201	0.308465	-3.59233	0.0255466
SEQC_NB092	0.402463	2.37645	0.494494		NBC-202	0.498641	-2.17963	0.28162
SEQC_NB093	-1.12507	-1.03468	0.0013245		NBC-204	0.314937	-0.502061	0.00126114
SEQC_NB094	0.462954	1.16957	0.794616		NBC-205	-0.180797	2.0944	0.243753
SEQC_NB095	-0.835469	-0.390278	7.77723e-05		NBC-206	0.507005	-5.00069	0.257728
SEQC_NB096	-0.363389	-1.23515	0.00142443		NBC-207	0.0772733	3.34716	0.638777
SEQC_NB097	-0.996994	-2.08828	0.000225514		NBC-21	0.0833747	-5.28976	0.735935
SEQC_NB098	-1.44144	0.330158	9.92412e-05		NBC-210	-0.445511	4.73456	0.656999
SEQC_NB099	-1.39436	-2.13525	0.000200182		NBC-211	-0.137259	3.65197	0.939373
SEQC_NB100	-1.80298	-1.92	6.3293e-05		NBC-212	0.103651	2.46136	0.270644
SEQC_NB101	-0.776734	-0.816231	0.00137243		NBC-215	-1.18158	1.02331	0.00998771
SEQC_NB102	-0.755273	0.289136	0.00198886		NBC-217	-2.78599	3.94317	0.00235605
SEQC_NB103	-0.786493	0.532474	0.117163		NBC-218	-0.301859	-3.22784	0.0039033
SEQC_NB104	-0.934282	-3.47746	0.000294536		NBC-219	0.0752359	-2.14013	0.000589401
SEQC_NB105	-0.516809	-2.47261	0.000430584		NBC-22	-1.39844	5.46267	0.0672479
SEQC_NB106	0.480535	1.1537	0.0104867		NBC-220	-0.40179	5.20138	0.733537
SEQC_NB107	-0.824238	-3.42602	1.46849e-05		NBC-221	-0.370017	-1.06962	0.632423
SEQC_NB108	0.299219	0.899788	0.0396158		NBC-223	-0.0775601	-1.45823	0.00093469
SEQC_NB109	-1.09284	-1.19054	6.06264e-05		NBC-224	-0.586002	-1.81926	0.0322199
SEQC_NB110	-1.24657	-1.72117	3.1993e-05		NBC-225	0.616667	0.767609	0.138057
SEQC_NB111	-0.87261	-1.24948	3.83207e-05		NBC-226	0.29147	3.97689	0.340302
SEQC_NB112	-0.618842	-0.782079	0.000110844		NBC-227	-0.116002	0.419314	0.00936455
SEQC_NB113	0.986438	3.07918	0.117896		NBC-228	0.607278	-4.43927	0.819333
SEQC_NB114	-1.7464	-1.9507	4.31428e-06		NBC-229	-2.19943	-1.1744	0.0320419
SEQC_NB115	-0.90287	-2.63425	2.27174e-05		NBC-23	0.0048529	-8.35747	0.0134113
SEQC_NB116	-1.22678	-0.706279	6.28938e-05		NBC-230	-0.124561	-4.32821	0.334939
SEQC_NB117	-1.06906	-1.99138	3.96859e-06		NBC-231	0.786165	-10.0962	0.184921
SEQC_NB118	-1.48309	-2.31499	7.70614e-06		NBC-233	0.622328	-2.41193	0.0415686
SEQC_NB119	0.216569	1.21602	0.244116		NBC-234	-0.507537	-4.1454	0.367947
SEQC_NB120	-0.940758	-2.87305	0.000141382		NBC-235	1.21344	-6.00222	0.250938
SEQC_NB121	-1.46231	-1.6209	3.23117e-05		NBC-236	-0.0708486	-2.75244	0.00951993
SEQC_NB122	0.749365	0.201556	0.860215		NBC-237	0.941955	0.136529	0.810125
SEQC_NB123	-0.75776	-0.624411	0.000178963		NBC-239	0.0525271	-2.60288	0.361413
SEQC_NB124	-0.13915	0.801553	0.134318		NBC-24	-2.08328	3.68009	0.807609
SEQC_NB125	-1.01769	-2.15869	8.70431e-05		NBC-240	0.607609	-2.00917	0.00240079
SEQC_NB126	-1.05243	-1.89709	5.57383e-06		NBC-241	-1.16244	0.812114	0.22313
SEQC_NB127	-0.153989	-0.277152	7.82985e-05		NBC-242	0.179637	2.20429	0.0410343
SEQC_NB128	-0.91402	-0.529891	0.000451177		NBC-243	-0.822676	-2.5668	0.0883572
SEQC_NB129	-0.905448	-0.705774	0.00230202		NBC-246	-0.297544	-7.76908	0.00444907
SEQC_NB130	-1.6538	-2.7331	9.7787e-05		NBC-247	0.496927	1.4391	0.0251843
SEQC_NB131	-1.46334	-2.25201	6.71783e-05		NBC-248	0.563135	-3.43698	0.155745
SEQC_NB132	-0.409738	-3.57693	0.000824034		NBC-249	-0.315983	0.536403	0.0231661
SEQC_NB133	-0.0782574	0.34887	0.0629091		NBC-25	0.192328	1.49807	0.285658
SEQC_NB134	-1.02145	-0.00507579	0.00506282		NBC-250	-1.71637	1.42192	0.008322
SEQC_NB135	-0.966964	-0.382301	0.000407457		NBC-251	-0.296638	-4.42454	0.155585
SEQC_NB136	1.20011	3.42697	0.749902		NBC-252	-0.216745	-4.5899	0.811555
SEQC_NB137	1.54467	3.62469	0.463249		NBC-255	0.332767	0.819039	0.862968
SEQC_NB138	1.46208	2.11185	0.0592297		NBC-256	0.519314	0.375921	0.0585428
SEQC_NB139	-0.938655	-3.31018	0.000652552		NBC-257	0.439461	-1.92524	0.256667
SEQC_NB140	0.216637	1.50924	0.779837		NBC-258	-0.140203	1.15914	0.0092513
SEQC_NB141	-0.934931	-1.78163	5.34746e-05		NBC-259	0.224719	2.27707	0.890548
SEQC_NB142	-0.229088	-1.51107	4.20556e-05		NBC-26	0.459851	3.41906	0.259876
SEQC_NB143	-0.210776	-2.01825	0.00248405		NBC-260	-0.275186	-0.796609	0.0108211
SEQC_NB144	0.669384	2.58947	0.0581954		NBC-263	-0.786797	1.6649	0.00294802
SEQC_NB145	-1.09767	-0.273041	0.000599176		NBC-264	-0.311514	-3.98392	0.0541911
SEQC_NB146	-1.22785	-1.07718	2.46034e-05		NBC-265	-0.507677	1.16946	0.0363206
SEQC_NB147	-1.3593	-4.55034	2.88182e-06		NBC-266	0.0467846	-2.19121	0.00863454
SEQC_NB148	-1.01379	-1.31534	0.000112469		NBC-269	0.328821	-3.70363	0.122679
SEQC_NB149	0.190394	0.903652	0.149292		NBC-27	-0.851583	-2.23441	0.106426
SEQC_NB150	-0.835308	-1.42844	9.56768e-05		NBC-270	-1.23114	-1.08497	0.012534
SEQC_NB151	-0.623991	-2.64167	0.000396669		NBC-273	0.0256233	-0.207282	0.000483662
SEQC_NB152	-0.796948	-1.4992	1.79247e-05		NBC-29	-0.918216	-0.240902	0.0544936
SEQC_NB153	-0.326437	-0.065644	0.0186903		NBC-3	-0.214322	-4.72669	0.0797366
SEQC_NB154	-1.05438	-1.69112	2.54974e-05		NBC-30	-0.195031	3.22193	0.149688
SEQC_NB155	-1.2943	-2.00976	6.15318e-06		NBC-31	0.813898	2.16563	0.868296
SEQC_NB156	-0.684933	-1.51231	0.000483423		NBC-32	0.136518	2.66077	0.0492494
SEQC_NB157	-1.04977	-0.512254	0.000128984		NBC-34	0.534739	-0.523157	0.00225899
SEQC_NB158	-0.456034	-1.96764	0.000430584		NBC-35	0.263368	-1.15632	0.0159971
SEQC_NB159	-0.6248	-0.301657	0.00221857		NBC-36	-0.685631	-2.38202	0.004181
SEQC_NB160	-1.15328	-3.40048	4.59857e-06		NBC-37	-0.520706	0.0708663	0.00560606
SEQC_NB161	-1.21211	-0.999399	7.32201e-06		NBC-38	0.157085	-1.41521	0.000796109
SEQC_NB162	-0.185468	-1.27246	0.00424263		NBC-39	-0.281031	0.515342	0.644465
SEQC_NB163	-1.18811	-1.22374	9.94376e-05		NBC-4	0.214591	-4.14565	0.0335299
SEQC_NB164	-1.38782	-3.72496	1.53576e-05		NBC-40	1.01006	-1.18438	0.00316328
SEQC_NB165	-0.191385	-1.60697	0.00040248		NBC-41	0.593893	-3.29132	0.0124534
SEQC_NB166	-0.317201	-1.29531	0.0021295		NBC-42	0.561095	-1.31546	0.00307745
SEQC_NB167	-1.31505	-3.48851	4.71022e-05		NBC-43	0.1929	0.414834	0.000657916
SEQC_NB168	-1.00016	-1.53884	0.000134856		NBC-44	0.522068	-2.67245	0.000248879
SEQC_NB169	1.89196	3.04264	0.927449		NBC-45	0.390722	-3.22954	0.000287712
SEQC_NB170	-1.14839	-0.949256	7.32684e-05		NBC-46	0.00120894	-0.152049	0.000749201
SEQC_NB171	-1.01887	-2.06629	4.82638e-06		NBC-47	-0.0394996	2.38851	0.0358908
SEQC_NB172	-0.316918	-0.625053	0.00684026		NBC-48	-1.04833	0.433434	0.000210911
SEQC_NB173	-0.0643938	-1.81107	0.00322345		NBC-49	0.579294	-2.22164	0.00416499
SEQC_NB174	-0.865255	-0.172266	0.000922024		NBC-5	-0.71183	-4.03267	0.97715
SEQC_NB175	1.58407	1.11471	0.0689034		NBC-50	0.460256	1.12145	0.00042513
SEQC_NB176	-0.155411	-1.06062	0.00147429		NBC-51	0.214277	2.71457	0.761975
SEQC_NB177	0.019435	-1.13562	0.000953972		NBC-52	0.762851	-1.78871	0.113728
SEQC_NB178	-0.611886	-1.76024	0.000273675		NBC-53	0.563705	1.2522	0.00503695
SEQC_NB179	-0.914132	-1.35397	1.53755e-05		NBC-54	-0.21299	-0.351505	0.00344685
SEQC_NB180	-0.601244	-0.40648	0.000986606		NBC-55	0.381181	0.132046	0.000863791
SEQC_NB181	-0.770495	-1.92142	8.93424e-06		NBC-56	0.0581175	0.424373	0.0232756
SEQC_NB182	-1.29073	-0.729946	0.000206023		NBC-57	0.122785	-2.04078	0.00140908
SEQC_NB183	-0.577799	-1.44713	0.000385582		NBC-58	0.52049	-5.01603	8.1499e-05
SEQC_NB184	-0.508631	-1.27049	0.000719547		NBC-59	0.0872028	-1.91818	0.00506976
SEQC_NB185	0.138922	-1.43965	0.0246078		NBC-60	0.242147	1.96212	0.00132528
SEQC_NB186	0.637458	1.87162	0.00566101		NBC-61	-0.0380393	1.14655	4.13096e-05
SEQC_NB187	-0.608453	-3.37634	0.00137317		NBC-62	-0.661776	1.49616	0.0163115
SEQC_NB188	1.45558	3.52206	0.767557		NBC-63	-0.234017	-2.71559	0.00381729
SEQC_NB189	-0.502111	-1.97309	0.00207761		NBC-64	0.507663	-3.54164	0.0554403
SEQC_NB190	1.15456	1.99042	0.8996		NBC-66	0.896595	0.687979	0.141294
SEQC_NB191	-1.06463	-1.79232	3.74226e-05		NBC-67	-0.48957	-2.0024	0.024228
SEQC_NB192	0.799069	1.82832	0.460768		NBC-68	1.45408	-5.60827	1.16845e-05
SEQC_NB193	-0.869429	-1.04544	0.000461519		NBC-69	-0.110087	0.393369	0.00101948
SEQC_NB194	0.923047	1.80527	0.535194		NBC-70	0.269695	-0.302197	0.00291771
SEQC_NB195	2.17321	3.39841	0.729238		NBC-71	0.985752	0.63044	0.00364238
SEQC_NB196	1.41903	0.338304	0.0383879		NBC-72	0.795934	-4.62248	0.00416619
SEQC_NB197	2.80556	3.46649	0.944105		NBC-73	0.903228	-0.101464	0.103005
SEQC_NB198	2.5409	3.93438	0.192329		NBC-75	1.25224	-1.29155	0.0117833
SEQC_NB199	-0.902671	-1.03138	0.000305206		NBC-77	0.21909	-0.41978	0.00606182
SEQC_NB200	-0.803883	-1.68499	1.67027e-06		NBC-78	-0.116532	-1.82585	0.00133008
SEQC_NB201	-1.82867	-2.56304	8.5248e-07		NBC-79	0.397682	-1.91416	0.000887185
SEQC_NB202	-0.507009	0.923871	0.000408381		NBC-8	0.533067	-1.10465	0.816686
SEQC_NB203	-0.714755	-1.97161	3.85502e-05		NBC-80	-0.00158279	0.268096	0.0564049
SEQC_NB204	-0.301625	0.628906	0.000708401		NBC-81	1.28337	-1.12207	0.0373956
SEQC_NB205	-0.617511	-2.30661	0.000174105		NBC-82	0.683148	-0.389051	0.00275502
SEQC_NB206	-0.551655	-1.27968	0.00300363		NBC-83	0.414228	0.955646	6.02027e-06
SEQC_NB207	-0.876298	-2.20838	2.41056e-05		NBC-84	0.0251201	-3.28709	5.98186e-05
SEQC_NB208	-1.19182	-2.75399	2.28138e-05		NBC-85	0.0237879	-0.30243	0.0103964
SEQC_NB209	-0.895886	-2.7175	5.02156e-05		NBC-86	-0.184543	1.14235	0.000585496
SEQC_NB210	-1.11205	-3.46797	9.5546e-06		NBC-87	0.0316938	1.29136	0.00681087
SEQC_NB211	-0.986336	-0.571219	3.62059e-06		NBC-88	-0.0585371	2.04486	0.000273764
SEQC_NB212	-0.851816	-1.63985	0.00010911		NBC-89	-0.166375	-0.372169	0.000603974
SEQC_NB213	-1.24014	-2.44709	2.60243e-06		NBC-9	0.0204899	-4.31426	0.954704
SEQC_NB214	0.185053	-0.42854	0.00256664		NBC-90	0.301083	1.40193	4.68968e-05
SEQC_NB215	-0.584258	-0.909493	5.23998e-05		NBC-91	0.779619	2.55949	0.00320569
SEQC_NB216	-0.742655	-0.895946	0.000332355		NBC-92	0.873427	-0.269895	0.000593245
SEQC_NB217	-1.2118	-2.2136	2.05367e-05		NBC-93	0.0528727	1.25874	0.00821239
SEQC_NB218	-0.866909	-1.06065	0.000126302		NBC-94	-0.503121	0.515811	0.00691605
SEQC_NB219	-0.370301	-0.279793	0.000277787		NBC-95	0.977962	-1.20679	0.00224835
SEQC_NB220	-1.03039	-1.18813	9.13757e-06		NBC-96	0.283251	-1.99903	0.000558645
SEQC_NB221	0.129406	-0.799388	0.00216976		NBC-97	0.297155	-0.847764	0.00158873
SEQC_NB222	0.653938	-0.363189	0.00829977		NBC-98	-0.0376323	-3.75411	0.000339121
SEQC_NB223	-1.27624	-2.53549	1.65628e-06		NBC-99	-0.236482	-4.06409	0.00253987
SEQC_NB224	-0.12174	1.91294	0.00380731
SEQC_NB225	-0.961938	-2.90089	7.48803e-05
SEQC_NB226	-0.656382	-1.81168	3.16293e-06
SEQC_NB227	-0.611397	-1.28142	0.000506818
SEQC_NB228	-0.58927	-2.54948	0.000251025
SEQC_NB229	0.134739	1.25851	0.0101778
SEQC_NB230	0.0117145	-0.350086	0.00483003
SEQC_NB231	0.353993	0.485038	0.018909
SEQC_NB232	-0.474851	-0.511069	0.000144005
SEQC_NB233	-0.479059	-3.57811	0.000182867
SEQC_NB234	-0.973391	-2.92385	0.000121056
SEQC_NB235	0.0139361	1.44574	0.0240721
SEQC_NB236	1.01846	0.986579	0.00773224
SEQC_NB237	0.14398	-1.66063	0.00191411
SEQC_NB238	-0.649752	-0.765247	0.00164488
SEQC_NB239	-0.045831	-1.82357	0.0028283
SEQC_NB240	0.223479	0.292789	0.00153098
SEQC_NB241	0.499421	2.24921	0.164535
SEQC_NB242	1.61346	3.44377	0.965698
SEQC_NB243	-0.261678	-0.950953	0.0372342
SEQC_NB244	-0.352628	1.46755	0.571005
SEQC_NB245	0.583312	1.88663	0.7284
SEQC_NB246	0.86169	1.00087	0.018708
SEQC_NB247	1.15058	1.32994	0.0342421
SEQC_NB248	0.840757	1.72696	0.0554911
SEQC_NB249	-0.118064	0.520346	0.00883588
SEQC_NB250	-0.291032	0.332103	0.7758
SEQC_NB251	-0.341698	-0.10684	0.00448412
SEQC_NB252	0.93895	-0.0722744	0.801706
SEQC_NB253	1.39581	2.19214	0.0327468
SEQC_NB254	1.37057	0.969884	0.136642
SEQC_NB255	0.578929	2.31013	0.774312
SEQC_NB256	2.2033	2.55057	0.516125
SEQC_NB257	2.45761	3.63111	0.888986
SEQC_NB258	1.24346	3.10121	0.153749
SEQC_NB259	2.2039	4.32003	0.686229
SEQC_NB260	1.28723	0.742846	0.0365165
SEQC_NB261	0.846011	1.29048	0.0214238
SEQC_NB262	2.5047	4.15324	0.38172
SEQC_NB263	1.80226	1.99512	0.830982
SEQC_NB264	0.329904	2.08173	0.47169
SEQC_NB265	1.22044	1.9258	0.129732
SEQC_NB266	0.964272	1.85012	0.0646206
SEQC_NB267	2.03585	3.57187	0.767835
SEQC_NB268	2.42238	3.68118	0.853288
SEQC_NB269	1.20221	1.97731	0.840046
SEQC_NB270	1.99267	2.34932	0.836579
SEQC_NB271	1.70073	2.29603	0.889213
SEQC_NB272	2.03158	3.09791	0.0334695
SEQC_NB273	-0.425679	-0.334928	0.00466982
SEQC_NB274	-0.883626	-1.57721	0.000152111
SEQC_NB275	-1.54536	-2.23433	8.91158e-06
SEQC_NB276	-1.45241	-2.68778	4.46067e-05
SEQC_NB277	-1.14004	-0.59158	0.000212222
SEQC_NB278	-0.641083	1.13082	0.0365319
SEQC_NB279	-1.02214	-1.22036	7.9019e-05
SEQC_NB280	-1.05601	-2.37566	1.36748e-05
SEQC_NB281	-1.4513	-2.66167	2.36628e-06
SEQC_NB282	-0.223107	0.31214	0.00028947
SEQC_NB283	-0.4677	-0.482951	0.00173658
SEQC_NB284	0.896047	2.51004	0.0450991
SEQC_NB285	-1.03216	-1.29473	0.00264442
SEQC_NB286	-1.12632	-2.69979	1.68656e-05
SEQC_NB287	-0.822202	-0.545185	0.000189722
SEQC_NB288	-0.868818	-0.489722	0.000697404
SEQC_NB289	0.873189	3.17674	0.0350749
SEQC_NB290	-0.290966	0.180587	0.0184933
SEQC_NB291	-0.571955	-1.42536	0.000334948
SEQC_NB292	-0.0603474	0.0150685	0.00608125
SEQC_NB293	-1.10061	-0.966201	0.00263533
SEQC_NB294	-1.05956	-1.6567	8.7139e-05
SEQC_NB295	0.147694	-0.329972	0.010074
SEQC_NB296	-1.19549	-3.07401	7.3773e-06
SEQC_NB297	-0.614215	-0.629946	0.00103372
SEQC_NB298	-0.234042	-1.73956	0.00128859
SEQC_NB299	-0.374792	-0.485977	0.00144923
SEQC_NB300	-0.0968391	-0.620023	0.00452524
SEQC_NB301	-1.0946	-1.86322	7.26346e-05
SEQC_NB302	-0.307115	0.0864371	0.0199734
SEQC_NB303	-0.760417	-1.86017	0.00118986
SEQC_NB304	0.510586	0.555905	0.00904274
SEQC_NB305	-0.274022	0.340313	0.414748
SEQC_NB306	-0.739056	-1.3352	6.3496e-05
SEQC_NB307	-1.12424	-3.96969	9.30424e-07
SEQC_NB308	-0.928586	0.0119371	0.00432912
SEQC_NB309	-0.801095	-1.06455	0.000572652
SEQC_NB310	-0.383855	0.129567	0.00100109
SEQC_NB311	-0.130758	0.725937	0.0201384
SEQC_NB312	-0.0679552	-0.986624	0.0286023
SEQC_NB313	1.68478	1.74376	0.135847
SEQC_NB314	1.57143	2.5152	0.696443
SEQC_NB315	-0.926524	-1.15142	0.00119799
SEQC_NB316	-0.0841966	1.96116	0.340329
SEQC_NB317	-0.698729	-3.06947	4.12903e-05
SEQC_NB318	-1.09279	-1.29493	0.000285715
SEQC_NB319	2.33592	4.81673	0.797571
SEQC_NB320	1.59537	2.47305	0.702699
SEQC_NB321	1.85213	3.68814	0.741297
SEQC_NB322	1.74128	3.79351	0.0861148
SEQC_NB323	1.34866	3.35928	0.663903
SEQC_NB324	-1.32171	-2.26133	2.85898e-06
SEQC_NB325	-1.31732	-2.58457	2.69175e-05
SEQC_NB326	1.2481	2.70198	0.708787
SEQC_NB327	0.857789	1.89012	0.325812
SEQC_NB328	1.8877	3.8345	0.886298
SEQC_NB329	-0.164251	0.614865	0.00734589
SEQC_NB330	-1.02436	0.323884	0.00781843
SEQC_NB331	1.42178	3.29205	0.65454
SEQC_NB332	2.43489	1.37327	0.025757
SEQC_NB333	0.8252	0.910459	0.158823
SEQC_NB334	0.324849	0.863547	0.112711
SEQC_NB335	0.305424	1.91417	0.0892602
SEQC_NB336	2.37548	3.60213	0.131041
SEQC_NB337	1.26858	3.2417	0.709637
SEQC_NB338	1.57093	3.34655	0.0310169
SEQC_NB339	1.60467	-0.160809	0.355321
SEQC_NB340	-1.44242	-2.96799	7.09286e-07
SEQC_NB341	-0.394989	1.9907	0.0707716
SEQC_NB342	-1.30606	-3.10021	6.83934e-06
SEQC_NB343	-0.862689	-1.41218	0.000226915
SEQC_NB344	-0.476815	-2.16942	6.42287e-06
SEQC_NB345	-0.873984	-3.38429	5.32994e-05
SEQC_NB346	-0.854245	-2.16002	2.12765e-05
SEQC_NB347	-0.98326	-1.1568	0.000138789
SEQC_NB348	-1.11965	-1.05841	8.8115e-05
SEQC_NB349	-0.00501606	-1.48622	0.00136834
SEQC_NB350	-0.451164	-3.05765	0.000467509
SEQC_NB351	1.19763	-0.190609	0.124314
SEQC_NB352	0.00983495	0.269393	0.0787648
SEQC_NB353	0.160242	1.38341	0.218801
SEQC_NB354	0.9971	2.19812	0.583336
SEQC_NB355	-1.14312	-2.76525	2.69615e-05
SEQC_NB356	-0.501432	-0.824795	0.00894019
SEQC_NB357	-0.75324	0.0107448	4.51075e-05
SEQC_NB358	-0.648135	-0.171979	0.00319201
SEQC_NB359	0.338844	0.185265	0.0205515
SEQC_NB360	1.33459	2.76182	0.068626
SEQC_NB361	1.80972	1.65788	0.0361851
SEQC_NB362	0.660082	2.20795	0.674638
SEQC_NB363	-0.987262	-0.759994	5.1125e-05
SEQC_NB364	-0.880714	0.315815	0.000324637
SEQC_NB365	-0.800417	-1.36006	6.12954e-05
SEQC_NB366	-0.742307	-1.49089	0.001077
SEQC_NB367	-1.28085	-2.71362	1.00987e-06
SEQC_NB368	-1.07895	-1.54537	3.81109e-05
SEQC_NB369	1.14926	1.41359	0.0102185
SEQC_NB370	-0.787591	-0.382838	0.000380307
SEQC_NB371	0.231058	1.3027	0.122025
SEQC_NB372	0.33038	0.186798	0.0200836
SEQC_NB373	1.27212	2.21634	0.627576
SEQC_NB374	1.73015	2.06808	0.0900908
SEQC_NB375	2.22939	5.11243	0.819195
SEQC_NB376	0.584105	2.20246	0.602883
SEQC_NB377	-0.263947	1.66058	0.00710091
SEQC_NB378	1.84144	3.73915	0.961473
SEQC_NB379	0.777047	1.39922	0.0329516
SEQC_NB380	-0.078716	0.120357	0.00298798
SEQC_NB381	2.0579	1.42557	0.458457
SEQC_NB382	-0.296121	-0.392874	0.0133844
SEQC_NB383	1.34363	2.7099	0.918318
SEQC_NB384	0.380196	2.16953	0.698092
SEQC_NB385	0.575279	2.64129	0.576958
SEQC_NB386	-0.489099	1.8008	0.41854
SEQC_NB387	-1.02465	-3.02031	0.000167966
SEQC_NB388	1.16537	2.98456	0.953551
SEQC_NB389	0.192065	0.795563	0.0269978
SEQC_NB390	3.5051	3.31962	0.898627
SEQC_NB391	0.932011	2.08362	0.0679769
SEQC_NB392	2.11631	1.61214	0.799408
SEQC_NB393	0.761645	1.74239	0.947738
SEQC_NB394	-0.834173	-1.22166	0.00517127
SEQC_NB395	-0.732725	-2.87143	3.13276e-05
SEQC_NB396	0.828351	2.23713	0.702407
SEQC_NB397	-0.799348	-0.57744	0.00184265
SEQC_NB398	-0.979005	-2.0495	2.96111e-05
SEQC_NB399	1.59217	1.42605	0.645493
SEQC_NB400	0.455799	0.894657	0.0525683
SEQC_NB401	1.2303	2.35305	0.0654914
SEQC_NB402	-0.636352	0.0579117	0.0708738
SEQC_NB403	2.18951	4.04028	0.717634
SEQC_NB404	0.797483	2.30893	0.115499
SEQC_NB405	1.82179	2.48614	0.13417
SEQC_NB406	1.61389	1.96154	0.931217
SEQC_NB407	1.94241	3.51846	0.827031
SEQC_NB408	1.51442	2.64444	0.113568
SEQC_NB409	-0.0849481	-1.10079	0.00344357
SEQC_NB410	1.14363	2.02714	0.950251
SEQC_NB411	0.707392	0.646134	0.014888
SEQC_NB412	-0.214636	0.0217391	0.0421496
SEQC_NB413	1.60471	1.88232	0.124265
SEQC_NB414	2.14924	3.85695	0.930132
SEQC_NB415	2.68955	2.59593	0.0702369
SEQC_NB416	0.11703	3.08902	0.0110899
SEQC_NB417	-1.15761	-2.42533	0.000434101
SEQC_NB418	-0.449944	0.190766	0.036649
SEQC_NB419	-1.14444	-2.25856	8.8646e-07
SEQC_NB420	-0.695025	-2.78219	2.48145e-05
SEQC_NB421	-1.08898	-1.74995	0.000405818
SEQC_NB422	0.690211	2.76915	0.0688659
SEQC_NB423	-0.0512963	1.06672	0.00808257
SEQC_NB424	1.91833	2.30691	0.0672875
SEQC_NB425	0.63125	0.784251	0.0181946
SEQC_NB426	0.665563	0.636618	0.00633046
SEQC_NB427	0.423743	-0.226237	0.0242094
SEQC_NB428	1.97152	2.39731	0.0964572
SEQC_NB429	-0.746074	-1.47185	0.000649929
SEQC_NB430	1.14956	2.60536	0.0178554
SEQC_NB431	1.59546	1.62046	0.0377664
SEQC_NB432	1.5428	0.730267	0.0921369
SEQC_NB433	-0.807127	-1.15636	7.97335e-06
SEQC_NB434	0.329951	-1.26427	0.00259998
SEQC_NB435	0.783711	-1.73694	0.0580475
SEQC_NB436	0.89406	0.30152	0.0255069
SEQC_NB437	2.44817	6.18971	0.940097
SEQC_NB438	1.85765	3.33796	0.717884
SEQC_NB439	0.54792	0.269323	0.556333
SEQC_NB440	2.79932	4.61733	0.941132
SEQC_NB441	0.133964	-0.0370075	0.0170944
SEQC_NB442	1.30307	3.38563	0.369405
SEQC_NB443	2.37017	3.89976	0.488409
SEQC_NB444	2.32103	1.77045	0.829261
SEQC_NB445	2.21825	5.52507	0.812298
SEQC_NB446	0.623194	2.22047	0.931902
SEQC_NB447	1.29805	0.493125	0.0296148
SEQC_NB448	1.42348	3.05441	0.085227
SEQC_NB449	2.21807	1.92642	0.187706
SEQC_NB450	1.90018	2.58759	0.377271
SEQC_NB451	0.422395	-0.397286	0.0609719
SEQC_NB452	-0.238998	-0.537375	0.000443041
SEQC_NB453	-0.369834	-0.792372	0.000413418
SEQC_NB454	1.55261	3.86046	0.775107
SEQC_NB455	0.470164	0.487107	0.0371114
SEQC_NB456	2.11872	2.68238	0.55359
SEQC_NB457	1.45279	1.27093	0.465763
SEQC_NB458	1.39155	1.98746	0.919541
SEQC_NB459	0.756786	0.87942	0.0552737
SEQC_NB460	0.924603	0.44606	0.048485
SEQC_NB461	1.79104	3.36566	0.0213352
SEQC_NB462	0.17588	-1.34314	0.00153941
SEQC_NB463	0.324693	-1.13899	0.00430644
SEQC_NB464	0.711968	3.18372	0.0516423
SEQC_NB465	2.62662	1.54069	0.882022
SEQC_NB466	0.81517	1.44444	0.00313792
SEQC_NB467	1.80597	3.88332	0.0569061
SEQC_NB468	-1.35036	-3.61203	0.000221699
SEQC_NB469	0.949695	1.93899	0.0316676
SEQC_NB470	-0.781914	-0.478618	0.000269383
SEQC_NB471	-1.18808	-2.09969	2.05178e-06
SEQC_NB472	0.0914989	0.469659	0.000903636
SEQC_NB473	0.169982	-0.45448	0.000340462
SEQC_NB474	-0.0919084	-0.493342	0.00171131
SEQC_NB475	1.18819	2.85582	0.36011
SEQC_NB476	-1.09135	-3.07708	4.05135e-05
SEQC_NB477	-0.909969	-1.6167	0.00077495
SEQC_NB478	-0.0563686	0.447304	0.0786382
SEQC_NB479	-0.471578	-1.96145	8.72929e-06
SEQC_NB480	0.197125	3.22535	0.00947148
SEQC_NB481	1.53298	2.78439	0.026101
SEQC_NB482	-0.769035	-1.18132	0.00013119
SEQC_NB483	0.649453	0.134849	0.0175614
SEQC_NB484	0.797427	1.63526	0.00743529
SEQC_NB485	1.27875	1.0173	0.114394
SEQC_NB486	1.46659	0.973128	0.0285966
SEQC_NB487	0.466341	0.656463	0.0370948
SEQC_NB488	-0.302504	-0.672419	0.00266844
SEQC_NB489	1.21161	2.77231	0.111466
SEQC_NB490	1.90841	2.85547	0.0817477
SEQC_NB491	1.08287	2.04578	0.109518
SEQC_NB492	1.55371	2.10315	0.0111631
SEQC_NB493	-0.843157	-0.676393	8.12287e-05
SEQC_NB494	-1.01858	-1.41806	5.81265e-05
SEQC_NB495	-1.07782	-2.66889	6.30452e-06
SEQC_NB496	-0.576114	-0.437593	0.00243309
SEQC_NB497	-0.769009	0.0904332	0.000436604
SEQC_NB498	-0.201281	-0.0820432	0.000438422

## Sheet: Table.S3
Table.S3 The nomogram point values and 3-year-survival probabilities
Items	Point		Total Point	3-year-survival probability
Probability: Low	3		-100	0
Probability: High	61		-50	0.0002
INSS-Risk: Low	3		0	0.0008
INSS-Risk: High	68		50	0.0035
Stage: 1	3		100	0.0151
Stage: 2	63		150	0.0644
Stage: 4S	82		200	0.2534
Stage: 3	92		250	0.7224
Stage: 4	100		300	0.9964
MYCN: Non-amplified	3		350	1
MYCN: Amplified	32		400	1
Age: 0	0
Age: 4	7
Age: 8	13
Age: 12	20
Age: 16	26
Age: 20	33
Age: 24	40
Age: 26	43

## Sheet: Table.S4
Table.S4 Pearson coefficient between mRNAs and lncRNAs
mRNA	lncRNA	coefficient	p-value
FBXO17	MIR181A2HG	0.567394	8.98e-44
FBXO17	MYCNOS	0.551749	5.14e-41
GNG11	HOTAIRM1	0.638158	2.63e-58
CCNB1	DLEU1	0.645613	4.6e-60
CCNB1	GUSBP11	-0.507934	5.09e-34
CCNB1	KIAA0087	-0.508359	4.4e-34
CCNB1	LPP-AS2	-0.57093	2.04e-44
CCNB1	MIAT	-0.525779	9.55e-37
CCNB1	MIR17HG	0.550343	8.95e-41
CCNB1	MYCNOS	0.543823	1.13e-39
CCNB1	POLR2J4	-0.533429	5.77e-38
CCNB1	SNHG1	0.680287	6.25e-69
CCNB1	SNHG6	0.519248	9.92e-36
CCNB1	TERC	0.518422	1.33e-35
KLF2	HCP5	0.687631	5.73e-71
KLF2	HLA-F-AS1	0.584519	5.76e-47
KLF2	HOTAIRM1	0.667874	1.28e-65
KLF2	LPP-AS2	0.52379	1.96e-36
KLF2	MIR155HG	0.561616	9.75e-43
CD9	C8orf31	-0.516618	2.51e-35
CD9	MIR17HG	-0.570731	2.22e-44
CD9	MYCNOS	-0.645925	3.87e-60
CD9	SNHG1	-0.625931	1.59e-55
CD9	TERC	-0.550494	8.44e-41

## Sheet: Table.S5
Table.S5 The ceRNA network nodes
Node1	Node2
CCNB1	MYCNOS
CCNB1	TERC
CCNB1	SNHG1
CCNB1	MIR17HG
CD9	MYCNOS
CD9	TERC
CD9	SNHG1
CD9	MIR17HG
CCNB1	hsa-miR-130a-3p
CCNB1	hsa-miR-7-5p
CCNB1	hsa-miR-590-3p
CCNB1	hsa-miR-130b-3p
CCNB1	hsa-miR-301a-3p
CCNB1	hsa-miR-149-5p
CCNB1	hsa-miR-197-3p
CCNB1	hsa-miR-301b-3p
CCNB1	hsa-miR-17-3p
CCNB1	hsa-miR-3619-5p
CCNB1	hsa-miR-500a-3p
CCNB1	hsa-miR-126-5p
CCNB1	hsa-miR-146a-5p
CCNB1	hsa-miR-146b-5p
CCNB1	hsa-miR-302a-3p
CCNB1	hsa-miR-302b-3p
CCNB1	hsa-miR-302c-3p
CCNB1	hsa-miR-302d-3p
CCNB1	hsa-miR-372-3p
CCNB1	hsa-miR-3928-3p
CCNB1	hsa-miR-454-3p
CCNB1	hsa-miR-589-5p
MIR17HG	hsa-miR-454-3p
MIR17HG	hsa-miR-302b-3p
MIR17HG	hsa-miR-301a-3p
MIR17HG	hsa-miR-130b-3p
MIR17HG	hsa-miR-130a-3p
MIR17HG	hsa-miR-301b-3p
MIR17HG	hsa-miR-302c-3p
MIR17HG	hsa-miR-302a-3p
MIR17HG	hsa-miR-302d-3p
MIR17HG	hsa-miR-372-3p
MIR17HG	hsa-miR-146a-5p
MIR17HG	hsa-miR-146b-5p
MYCNOS	hsa-miR-3619-5p
MIR17HG	hsa-miR-500a-3p
MIR17HG	hsa-miR-17-3p
MIR17HG	hsa-miR-590-3p
MIR17HG	hsa-miR-149-5p
SNHG1	hsa-miR-146a-5p
SNHG1	hsa-miR-197-3p
SNHG1	hsa-miR-3928-3p
SNHG1	hsa-miR-590-3p
MIR17HG	hsa-miR-126-5p
SNHG1	hsa-miR-146b-5p
SNHG1	hsa-miR-589-5p
MYCNOS	hsa-miR-7-5p

## Sheet: Table.S6
Table.S6 Univariable cox results of cell types
Cox result on all sample						Cox result on S1						Cox result on S2
Cell type	HR	HR.95L	HR.95H	pvalue		Cell type	HR	HR.95L	HR.95H	pvalue		Cell type	HR	HR.95L	HR.95H	pvalue
Activated.B.cell	1.85087	1.53784	2.22761	7.37878e-11		Activated.B.cell	2.46066	1.403	4.31565	0.00168225		Activated.B.cell	0.935117	0.759567	1.15124	0.527153
Activated.CD4.T.cell	0.805887	0.668952	0.970852	0.0231295		Activated.CD4.T.cell	1.36716	0.775328	2.41075	0.279854		Activated.CD4.T.cell	0.878689	0.743032	1.03911	0.130653
Activated.CD8.T.cell	0.93423	0.770998	1.13202	0.487456		Activated.CD8.T.cell	2.41737	1.44582	4.04179	0.000763336		Activated.CD8.T.cell	0.809898	0.673139	0.974443	0.0254626
Activated.dendritic.cell	1.1277	0.921085	1.38067	0.244471		Activated.dendritic.cell	0.999217	0.566375	1.76285	0.997842		Activated.dendritic.cell	0.979248	0.812526	1.18018	0.8257
CD56bright.natural.killer.cell	1.16179	0.959541	1.40667	0.124357		CD56bright.natural.killer.cell	1.24171	0.74542	2.06842	0.405692		CD56bright.natural.killer.cell	0.978823	0.809249	1.18393	0.825472
CD56dim.natural.killer.cell	1.27116	1.05123	1.5371	0.0133071		CD56dim.natural.killer.cell	1.36951	0.842724	2.22558	0.204347		CD56dim.natural.killer.cell	1.17901	0.949327	1.46427	0.136334
Central.memory.CD4.T.cell	1.63484	1.34415	1.98839	8.61909e-07		Central.memory.CD4.T.cell	1.42888	0.840992	2.42773	0.186955		Central.memory.CD4.T.cell	1.06744	0.869308	1.31073	0.533299
Central.memory.CD8.T.cell	0.602117	0.501463	0.722974	5.45983e-08		Central.memory.CD8.T.cell	0.565389	0.330545	0.967083	0.0373262		Central.memory.CD8.T.cell	1.00848	0.834236	1.21912	0.930451
Effector.memeory.CD4.T.cell	1.18763	0.973063	1.44951	0.0907646		Effector.memeory.CD4.T.cell	0.413575	0.221896	0.770829	0.00544719		Effector.memeory.CD4.T.cell	1.1219	0.940121	1.33882	0.202194
Effector.memeory.CD8.T.cell	0.945331	0.780014	1.14569	0.566484		Effector.memeory.CD8.T.cell	1.02681	0.624886	1.68726	0.916834		Effector.memeory.CD8.T.cell	0.82168	0.667598	1.01133	0.0637859
Endothelial.cells	1.68505	1.39879	2.02989	3.95613e-08		Endothelial.cells	1.4458	0.845509	2.47229	0.178022		Endothelial.cells	1.15499	0.95259	1.40039	0.142688
Eosinophil	1.56209	1.30982	1.86295	6.93201e-07		Eosinophil	1.00367	0.567104	1.77629	0.989978		Eosinophil	0.971555	0.796044	1.18576	0.776507
Fibroblasts	1.17526	0.96581	1.43013	0.106837		Fibroblasts	1.35547	0.811878	2.26304	0.244811		Fibroblasts	1.19678	0.976664	1.46651	0.0832273
Gamma.delta.T.cell	0.462583	0.384167	0.557006	4.13427e-16		Gamma.delta.T.cell	0.749715	0.431167	1.30361	0.307445		Gamma.delta.T.cell	0.796254	0.63891	0.992347	0.0425237
Immature..B.cell	2.09783	1.69503	2.59634	9.68169e-12		Immature..B.cell	1.80441	1.01731	3.2005	0.0435229		Immature..B.cell	0.900917	0.687546	1.18051	0.449267
Immature.dendritic.cell	1.61244	1.34929	1.9269	1.47574e-07		Immature.dendritic.cell	1.39714	0.822583	2.37303	0.215956		Immature.dendritic.cell	1.03816	0.850128	1.26779	0.713359
Macrophage	0.487857	0.39855	0.597178	3.46578e-12		Macrophage	0.224183	0.121151	0.414838	1.91583e-06		Macrophage	0.886989	0.714664	1.10087	0.276568
Mast.cell	1.08205	0.889714	1.31596	0.429697		Mast.cell	1.33508	0.769587	2.31611	0.303867		Mast.cell	1.06862	0.90717	1.2588	0.427111
MDSC	1.48456	1.23859	1.77937	1.90968e-05		MDSC	1.59952	1.00183	2.55379	0.0491109		MDSC	0.925118	0.74529	1.14834	0.480328
Memory.B.cell	0.746261	0.615923	0.904181	0.00280417		Memory.B.cell	1.87884	1.15246	3.06306	0.011439		Memory.B.cell	1.06271	0.878508	1.28554	0.531136
Monocyte	1.81975	1.51962	2.17917	7.49767e-11		Monocyte	0.982325	0.553454	1.74353	0.951422		Monocyte	1.2614	1.01997	1.55998	0.0321621
Natural.killer.cell	2.03461	1.71678	2.41129	2.48083e-16		Natural.killer.cell	1.08855	0.571967	2.07171	0.796079		Natural.killer.cell	1.2469	1.02072	1.52321	0.0307127
Natural.killer.T.cell	0.895328	0.738802	1.08502	0.259435		Natural.killer.T.cell	0.653174	0.407197	1.04774	0.0773064		Natural.killer.T.cell	1.04586	0.829046	1.31938	0.705201
Neutrophil	1.00189	0.826991	1.21378	0.984618		Neutrophil	1.17786	0.70129	1.97831	0.536072		Neutrophil	1.15238	0.954249	1.39165	0.14063
Plasmacytoid.dendritic.cell	1.28433	1.06653	1.54661	0.00830872		Plasmacytoid.dendritic.cell	1.06208	0.653334	1.72656	0.80804		Plasmacytoid.dendritic.cell	0.977788	0.796829	1.19984	0.829671
Regulatory.T.cell	1.75662	1.46203	2.11057	1.7938e-09		Regulatory.T.cell	1.2307	0.722104	2.0975	0.445416		Regulatory.T.cell	1.16239	0.939474	1.43821	0.165981
T.follicular.helper.cell	0.9315	0.762073	1.13859	0.488447		T.follicular.helper.cell	0.996522	0.580546	1.71055	0.989915		T.follicular.helper.cell	0.989908	0.818977	1.19652	0.916476
Type.1.T.helper.cell	1.01231	0.833269	1.22983	0.901931		Type.1.T.helper.cell	1.44788	0.88454	2.37001	0.14102		Type.1.T.helper.cell	0.85845	0.703262	1.04788	0.133555
Type.17.T.helper.cell	0.811504	0.674061	0.976973	0.027383		Type.17.T.helper.cell	1.02024	0.594359	1.75128	0.942051		Type.17.T.helper.cell	0.911245	0.768545	1.08044	0.284799
Type.2.T.helper.cell	1.38311	1.14831	1.66592	0.000633575		Type.2.T.helper.cell	0.905129	0.497548	1.64659	0.744055		Type.2.T.helper.cell	0.941541	0.78062	1.13564	0.528758
